# Supplementary material for: PHYTOCHROME C regulation of photoperiodic flowering via PHOTOPERIOD1 is mediated by EARLY FLOWERING 3 in Brachypodium distachyon
Source: PubMed Central journal article supplement (PMC10171608; doi:10.1371/journal.pgen.1010706), 2023-05-10
Supplement: pgen.1010706.s003.pdf [file pgen.1010706.s003.pdf]

**Table S1** Primers used in this study

| Purpose                     | Primers        | Sequence                    | NEB enzyme | Reference                  |
|-----------------------------|----------------|-----------------------------|------------|----------------------------|
| qPCR                        | qUBC18-F       | GTCACCCGCAATGACTGTAAGTTC    |            | [1]<br>Ream et al., 2014   |
|                             | qUBC18-R       | TTGTCTTGCGGACGTTGCTTTG      |            |                            |
|                             | qFT1-F         | TTCGGGAACAGGAACGTGTCCAAC    |            |                            |
|                             | qFT1-R         | AGCATCTGGGTCTACCATCACGAG    |            |                            |
|                             | qVRN1-F        | GCTCTGCAGAAGGAACCTTGTGG     |            |                            |
|                             | qVRN1-R        | CTAGTTTGCGGGTGTGTTTGCTC     |            |                            |
|                             | qVRN2-F        | ATGCATGAGAGAGAGGCGAAGG      |            |                            |
|                             | qVRN2-R        | TCGTAGCGGATCTGCTTCTCGTAG    |            |                            |
|                             | qPPD1-F2       | CTATGCCGTCGCTTGAGTTG        |            | This paper                 |
|                             | qPPD1-R2       | TGCCGCCTTGATTGGAAACC        |            |                            |
|                             | qCO1-F         | AGAGTGGTTATGGGCTTGGA        |            |                            |
|                             | qCO1-R         | CTATCACCGTATTGTCTGGG        |            |                            |
|                             | qCO2-F         | GGCAAGTGAGGAACAGGAAAG       |            |                            |
|                             | qCO2-R         | TAGGCTCCACTGGTTGTTAGG       |            |                            |
| Fine Mapping and genotyping | dCaps0241800-F | CCGTCTCCAGATTATACCTATCCG    | Hpy188I    | This paper                 |
|                             | dCaps0241800-R | GAGTGTGATTTAGCCCTTG         |            |                            |
|                             | pdd1_F         | CAACCGGAGATGGTGGAAATG       | Hpy166II   |                            |
|                             | pdd1_R         | GGACACTGATATTATGTTGTGC      |            |                            |
|                             | dCaps0229500-F | AAAGTCCTGCTGGCGCTCGTG       | BsrDI      |                            |
|                             | dCaps0229500-R | TGACGCCGTGCTCCGGCTCTGCAA    |            |                            |
|                             | elf3-F         | CACCCATGCCTCCAATGTA CT TCCC | Hpy166II   | [2]<br>Bouche et al., 2022 |
|                             | elf3-R         | GGTGGTTTCAGCTTCTGCAGGTGAA   |            |                            |

**Reference**

- 1) Ream TS, Woods DP, Schwartz CJ, Sanabria CP, Mahoy JA, Walters EM, et al. Interaction of Photoperiod and Vernalization Determines Flowering Time of *Brachypodium distachyon*. *Plant Physiol.* 2014;164: 694–709. doi:10.1104/pp.113.232678
- 2) Bouché F, Woods DP, Linden J, Li W, Mayer KS, Amasino RM, et al. EARLY FLOWERING 3 and Photoperiod Sensing in *Brachypodium distachyon*. *Front Plant Sci.* 2021;12: 769194. doi:10.3389/fpls.2021.769194
